# Supplementary material for: Preparation of polybenzoxazole nanofibers by a downsizing process
Source: Royal Society of Chemistry journal article supplement (doi:10.1039/c5ra04679c), 2015-01-01
Supplement: c5ra04679c1.pdf [file c5ra04679c1.pdf]

Supplementary Information

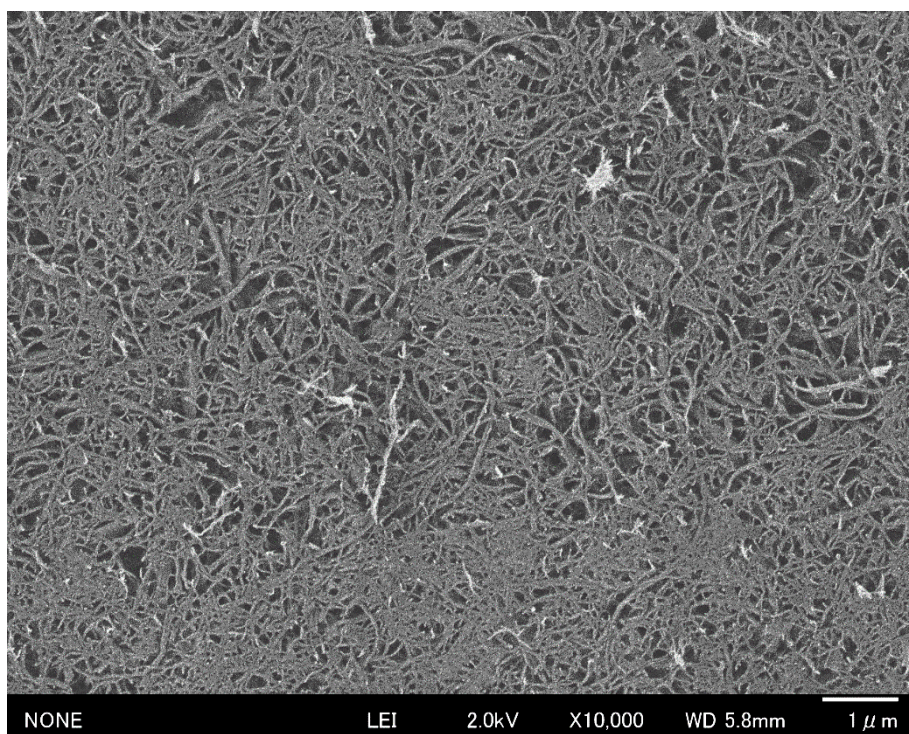

Figure S1. FE-SEM image poly(*p*-phenylene benzobisoxazole) nanofibers

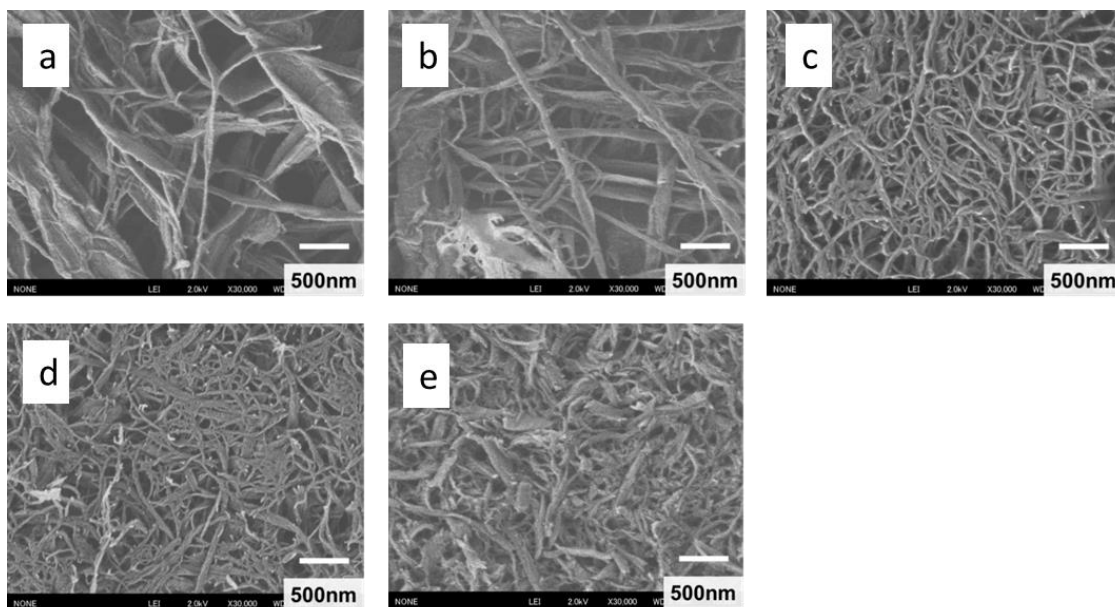

Figure S2. FE-SEM images poly(*p*-phenylene benzobisoxazole) nanofibers with different alkaline hydrolysis times of (a) 3 h, (b) 12 h, (c) 1 week, (d) 2 weeks, and (e) 3 weeks.
